# Supplementary material for: A systematic review of measures of self-reported adherence to unsupervised home-based rehabilitation exercise programmes, and their psychometric properties
Source: HighWire-hosted journal article supplement (doi:10.1136/bmjopen-2014-005044), 2014-06-01
Supplement: bmjopen-2014-005044supp_appendix1.pdf [file bmjopen-2014-005044supp_appendix1.pdf]

Appendix 1.

Search strategy with limiters for Ovid SP (Medline (R) )

1. exp Patient Compliance/
2. patient compliance.ti,ab.
3. "medic\* adhere\*".ti,ab.
4. exp Medication Adherence/
5. 1 or 2
6. 3 or 4
7. (1 or 2) not (3 or 4)
8. exp exercise therapy/ or exp rehabilitation/ or self care/ or exp self administration/
9. exercise therapy.ti,ab.
10. exercise.ti,ab.
11. rehabilitat\*.ti,ab.
12. "self care".ti,ab.
13. "self administration".ti,ab.
14. exp exercise/ or exp muscle stretching exercises/ or exp resistance training/
15. exp Exercise Tolerance/
16. "physical activity".ti,ab.
17. "attitude of health personnel"/ or exp attitude to health/
18. value\*.ti,ab.
19. attitude\*.ti,ab.
20. belief\*.ti,ab.
21. (functional adj3 (therapy or restor\*)).mp. [mp=title, abstract, original title, name of substance word, subject heading word, protocol supplementary concept, rare disease supplementary concept, unique identifier]
22. functional therap\*.ti,ab.
23. exp Questionnaires/cl, mt, st, td [Classification, Methods, Standards, Trends]
24. exp Self Report/st, ut [Standards, Utilization]
25. questionnaire\*.ti,ab.
26. "self report".ti,ab.
27. "patient report".ti,ab.
28. exp exercise/ or exp physical fitness/
29. 17 or 18 or 19 or 20
30. 23 or 24 or 25 or 26 or 27
31. 7 or 29
32. 8 or 9 or 10 or 11 or 12 or 13 or 14 or 15 or 16 or 21 or 22 or 28
33. 30 and 31 and 32

**(Ovid MEDLINE(R) In-Process & Other Non-Indexed Citations and Ovid MEDLINE(R) 1946 to Present)**

limit 28 to (english language and humans and ("all adult (19 plus years)" or "adolescent (13 to 18 years)"))
