# Supplementary material for: A systematic review of measures of self-reported adherence to unsupervised home-based rehabilitation exercise programmes, and their psychometric properties
Source: HighWire-hosted journal article supplement (doi:10.1136/bmjopen-2014-005044), 2014-06-01
Supplement: bmjopen-2014-005044supp_appendix3.pdf [file bmjopen-2014-005044supp_appendix3.pdf]

Appendix 3. Table displaying the evaluated Psychometric Properties of all measures included in the systematic review

| Author and year                      | content validity | internal consistency | criterion validity | construct validity | reproducibility |             | responsiveness | floor and ceiling | interpretability |
|--------------------------------------|------------------|----------------------|--------------------|--------------------|-----------------|-------------|----------------|-------------------|------------------|
|                                      |                  |                      |                    |                    | agreement       | reliability |                |                   |                  |
| Alewijnse<br>2003 <sup>51</sup>      | 0                | 0                    | 0                  | ?                  | 0               | 0           | 0              | 0                 | ?                |
| Alexandre<br>2002 <sup>15</sup>      | -                | 0                    | 0                  | ?                  | 0               | 0           | 0              | 0                 | 0                |
| Barnowski<br>1998 <sup>62</sup>      | 0                | 0                    | 0                  | ?                  | 0               | 0           | 0              | 0                 | ?                |
| Bassett<br>2011 <sup>16</sup>        | 0                | ?                    | 0                  | ?                  | 0               | 0           | 0              | 0                 | ?                |
| Bennell<br>2012 <sup>17</sup>        | 0                | 0                    | 0                  | 0                  | 0               | 0           | 0              | 0                 | 0                |
| Borello-France<br>2008 <sup>53</sup> | -                | 0                    | 0                  | 0                  | 0               | 0           | 0              | 0                 | 0                |
| Borello-France<br>2010 <sup>52</sup> | 0                | 0                    | 0                  | 0                  | 0               | 0           | 0              | 0                 | 0                |
| Brovold<br>2012 <sup>58</sup>        | 0                | 0                    | 0                  | 0                  | 0               | 0           | 0              | 0                 | 0                |
| Chen<br>1999 <sup>18</sup>           | 0                | 0                    | 0                  | ?                  | 0               | 0           | 0              | 0                 | 0                |
| Chen<br>2009 <sup>54</sup>           | ?                | ?                    | 0                  | 0                  | 0               | 0           | 0              | 0                 | 0                |
| Cockram<br>2006 <sup>47</sup>        | 0                | 0                    | 0                  | 0                  | 0               | 0           | 0              | 0                 | 0                |
| Courneya<br>2004 <sup>13</sup>       | 0                | 0                    | 0                  | ?                  | 0               | 0           | 0              | 0                 | 0                |
| Dobkin<br>2008 <sup>19</sup>         |                  |                      |                    |                    |                 |             |                |                   |                  |
| GAS                                  | 0                | 0                    | 0                  | ?                  | 0               | ?           | 0              | 0                 | ?                |
| SAS                                  | 0                | 0                    | 0                  | ?                  | 0               | 0           | 0              | 0                 | ?                |
| Donesky-Cuenco<br>2007 <sup>48</sup> | 0                | 0                    | 0                  | ?                  | 0               | 0           | 0              | 0                 | ?                |

|                                   |   |   |   |   |   |   |   |   |   |
|-----------------------------------|---|---|---|---|---|---|---|---|---|
| Duncan<br>2002 <sup>38</sup>      | 0 | 0 | 0 | 0 | 0 | 0 | 0 | 0 | 0 |
| Ettinger<br>1997 <sup>20</sup>    | 0 | 0 | 0 | 0 | 0 | 0 | 0 | 0 | 0 |
| Evangelista<br>2001 <sup>39</sup> | + | ? | 0 | ? | 0 | 0 | 0 | 0 | 0 |
| Forkan<br>2006 <sup>59</sup>      | ? | 0 | 0 | 0 | 0 | 0 | 0 | 0 | 0 |
| Fukuoka<br>2011 <sup>67</sup>     | 0 | 0 | 0 | ? | 0 | 0 | 0 | 0 | 0 |
| Gallo<br>1997 <sup>55</sup>       | ? | 0 | 0 | 0 | 0 | ? | 0 | 0 | 0 |
| Gary<br>2011 <sup>40</sup>        | 0 | 0 | 0 | 0 | 0 | 0 | 0 | 0 | ? |
| Hardage<br>2007 <sup>60</sup>     |   |   |   |   |   |   |   |   |   |
| AESOP                             | + | 0 | ? | - | 0 | ? | 0 | - | 0 |
| Monthly calendars                 | 0 | 0 | 0 | 0 | 0 | 0 | 0 | 0 | 0 |
| Howard<br>2008 <sup>21</sup>      | ? | 0 | 0 | ? | 0 | 0 | 0 | 0 | ? |
| Jurkiewicz<br>2011 <sup>41</sup>  | 0 | 0 | 0 | 0 | 0 | 0 | 0 | 0 | ? |
| Khalil<br>2012 <sup>50</sup>      | 0 | 0 | 0 | 0 | 0 | 0 | 0 | 0 | 0 |
| Telephone questionnaire           | 0 | 0 | 0 | 0 | 0 | 0 | 0 | 0 | 0 |
| Log                               | 0 | 0 | 0 | 0 | 0 | 0 | 0 | 0 | 0 |
| Kim<br>2006 <sup>56</sup>         | 0 | 0 | 0 | 0 | 0 | 0 | 0 | 0 | ? |
| King<br>1991 <sup>68</sup>        | 0 | 0 | ? | ? | 0 | 0 | 0 | 0 | ? |
| King<br>2012 <sup>42</sup>        | 0 | 0 | 0 | 0 | 0 | 0 | 0 | 0 | 0 |
| Levy<br>2008 <sup>22</sup>        | 0 | ? | 0 | - | 0 | 0 | 0 | 0 | ? |
| Levy<br>2008 <sup>23</sup>        | 0 | ? | 0 | - | 0 | 0 | 0 | 0 | ? |

|                                       |   |   |   |   |   |   |   |   |   |
|---------------------------------------|---|---|---|---|---|---|---|---|---|
| Lyngcoln<br>2005 <sup>63</sup>        | 0 | 0 | 0 | ? | 0 | 0 | 0 | 0 | 0 |
| Lysack<br>2005 <sup>64</sup>          | 0 | 0 | 0 | 0 | 0 | 0 | 0 | ? | 0 |
| Mailloux<br>2006 <sup>24</sup>        | 0 | 0 | 0 | 0 | 0 | 0 | 0 | 0 | ? |
| Mannion<br>2009 <sup>25</sup>         | 0 | 0 | 0 | ? | 0 | 0 | 0 | 0 | 0 |
| Marzolini<br>2010 <sup>43</sup>       | - | 0 | 0 | 0 | 0 | 0 | 0 | 0 | 0 |
| McCarthy<br>2004 <sup>26</sup>        | 0 | 0 | 0 | 0 | 0 | 0 | 0 | 0 | 0 |
| Medina-Mirapeix<br>2009 <sup>27</sup> | 0 | 0 | 0 | 0 | 0 | 0 | 0 | 0 | 0 |
| Michener<br>2001 <sup>28</sup>        | - | 0 | 0 | 0 | 0 | 0 | 0 | 0 | 0 |
| Milne<br>2005 <sup>29</sup>           | 0 | 0 | 0 | 0 | 0 | 0 | 0 | 0 | 0 |
| Mori<br>2006 <sup>57</sup>            | 0 | 0 | 0 | ? | 0 | 0 | 0 | 0 | 0 |
| Oka<br>2000 <sup>44</sup>             | 0 | 0 | 0 | 0 | 0 | 0 | 0 | 0 | 0 |
| Pickett<br>2002 <sup>14</sup>         | - | 0 | 0 | 0 | 0 | 0 | 0 | 0 | 0 |
| Rackwitz<br>2007 <sup>30</sup>        | - | 0 | 0 | 0 | 0 | 0 | 0 | 0 | 0 |
| Radtke<br>1989 <sup>45</sup>          | - | 0 | 0 | ? | 0 | 0 | 0 | 0 | 0 |
| Roddey<br>2002 <sup>31</sup>          | 0 | 0 | 0 | 0 | 0 | 0 | 0 | 0 | ? |
| Saez<br>2004 <sup>32</sup>            | - | 0 | 0 | 0 | 0 | 0 | 0 | 0 | 0 |
| Salo<br>2012 <sup>33</sup>            | 0 | 0 | 0 | 0 | 0 | 0 | 0 | 0 | 0 |
| Schoo<br>2005 <sup>34</sup>           | - | 0 | 0 | 0 | 0 | 0 | 0 | 0 | ? |

|                                   |   |   |   |   |   |   |   |   |   |
|-----------------------------------|---|---|---|---|---|---|---|---|---|
| Sluijs<br>1993 <sup>35</sup>      | 0 | 0 | 0 | ? | 0 | 0 | 0 | 0 | ? |
| Spink<br>2012 <sup>61</sup>       | 0 | 0 | 0 | 0 | 0 | 0 | 0 | 0 | 0 |
| Steinhilber<br>2012 <sup>36</sup> | 0 | 0 | 0 | 0 | 0 | 0 | 0 | 0 | 0 |
| Terpstra<br>1992 <sup>37</sup>    | ? | 0 | 0 | 0 | 0 | 0 | 0 | 0 | 0 |
| Tooth<br>1993 <sup>46</sup>       | 0 | 0 | 0 | 0 | 0 | 0 | 0 | 0 | 0 |
| van Leer<br>2012 <sup>66</sup>    | 0 | 0 | 0 | 0 | 0 | 0 | 0 | 0 | 0 |
| Wang<br>2012 <sup>69</sup>        | 0 | 0 | 0 | 0 | 0 | 0 | 0 | 0 | 0 |
| White<br>2007 <sup>49</sup>       | ? | 0 | 0 | 0 | 0 | 0 | 0 | 0 | 0 |
| Wilbur<br>2001 <sup>70</sup>      | 0 | 0 | ? | 0 | 0 | 0 | 0 | 0 | 0 |
| Zagarins<br>2011 <sup>65</sup>    | 0 | 0 | 0 | 0 | 0 | 0 | 0 | 0 | 0 |

**Key**

The criteria the construct needed to obtain to get a certain rating varied greatly as each aspect was different. Therefore please see<sup>15</sup> for the criteria needed for each construct for the different ratings.

+ = A positive rating where the paper and measure have addressed each of the criteria for a positive rating to a satisfactory extent

? = An intermediate rating where the paper and measure have possibly completed some of the aspects needed for a positive rating, but not all of the required aspects or the method or design used is doubtful

- = A negative where the aspect being measured proved to be non-existent or fall below specified thresholds despite the method and design used were sufficient

0 = A 0 was accredited when there was no information in the paper or evident in the measure that this aspect had been considered.
