# Supplementary material for: A systematic review of measures of self-reported adherence to unsupervised home-based rehabilitation exercise programmes, and their psychometric properties
Source: HighWire-hosted journal article supplement (doi:10.1136/bmjopen-2014-005044), 2014-06-01
Supplement: bmjopen-2014-005044supp_figure.pdf [file bmjopen-2014-005044supp_figure.pdf]

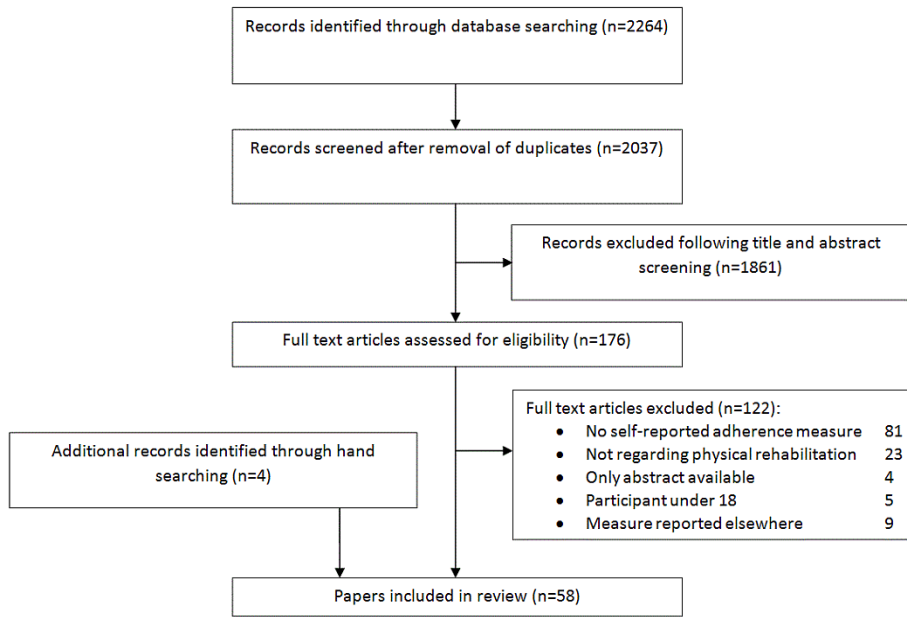

Figure 1 Flow diagram outlining the process of selection of papers for the systematic review
